# Supplementary material for: Gender Differences in Body Evaluation: Do Men Show More Self-Serving Double Standards Than Women?
Source: Front Psychol. 2019 Mar 12;10:544. doi: 10.3389/fpsyg.2019.00544 (PMC6428027; doi:10.3389/fpsyg.2019.00544)
Supplement: Supplementary file 1 [file Table_1.docx]

**Results with age as a covariate:**

**Table 1**

*Means, standard errors, confidence intervals of the means, and post-hoc
t-test results for the double standard scores for each rating variable*

*dependent on the factors Group and Build*

|  | Women | | | Men | | | | Over both  groups | | |
| --- | --- | --- | --- | --- | --- | --- | --- | --- | --- | --- |
| Variables | *M* | *SE* |  | | *M* | *SE* |  | | *M* | *SE* |
| *DS valence* |  |  |  | |  |  |  | |  |  |
| Thin | .091be | .113 |  | | -.300*af | .120 |  | | -.104e | .080 |
| Average-weight | .135bef | .090 |  | | -.346*af | .095 |  | | -.106e | .064 |
| Overweight | -.769*cdfg | .097 |  | | -.557*fg | .102 |  | | -.663*cdfg | .069 |
| Athletic | -.171bde | .088 |  | | .280*acdeg | .093 |  | | .054e | .062 |
| Hypermuscular | -.164*e | .082 |  | | -.070ef | .087 |  | | -.117*e | .058 |
| Over all builds | -.176* | .054 |  | | -.199* | .058 |  | | -.187* | .039 |
| *DS arousal* |  |  |  | |  |  |  | |  |  |
| Thin | .412* | .112 |  | | .720* | .119 |  | | .566* | .080 |
| Average-weight | .423* | .096 |  | | .426* | .102 |  | | .424* | .068 |
| Overweight | 1.039* | .132 |  | | .821* | .140 |  | | .930* | .094 |
| Athletic | .478* | .101 |  | | .530* | .107 |  | | .504* | .072 |
| Hypermuscular | .470* | .104 |  | | .634* | .110 |  | | .552*e | .074 |
| Over all builds | .564* | .079 |  | | .626* | .084 |  | | .595* | .056 |
| *DS body attractiveness* |  |  |  | |  |  |  | |  |  |
| Thin | .031e | .117 |  | | -.127 | .124 |  | | -.048e | .083 |
| Average-weight | -.010be | .089 |  | | -.346*af | .095 |  | | -.178* | .064 |
| Overweight | -.529*cdfg | .079 |  | | -.393*f | .084 |  | | -.461* | .057 |
| Athletic | -.149be | .094 |  | | .203*adeg | .100 |  | | .027e | .067 |
| Hypermuscular | -.149e | .091 |  | | -.257*f | .097 |  | | -.203* | .065 |
| Over all builds | -.161* | .057 |  | | -.184* | .060 |  | | -.173* | .040 |
| *DS body fat* |  |  |  | |  |  |  | |  |  |
| Thin | -.124*e | .060 |  | | -.237*de | .064 |  | | -.181* | .043 |
| Average-weight | .083be | .074 |  | | .441*acfg | .079 |  | | .262* | .053 |
| Overweight | .381*cdfg | .071 |  | | .363*cfg | .075 |  | | .372* | .051 |
| Athletic | -.145e | .082 |  | | -.010de | .087 |  | | -.077 | .058 |
| Hypermuscular | -.062e | .069 |  | | -.030de | .074 |  | | -.046 | .049 |
| Over all builds | .026 | .033 |  | | .105* | .035 |  | | .066* | .023 |
| *DS muscle mass* |  |  |  | |  |  |  | |  |  |
| Thin | -.016 | .078 |  | | -.200* | .083 |  | | -.108 | .055 |
| Average-weight | -.086 | .072 |  | | -.174* | .077 |  | | -.130* | .051 |
| Overweight | -.262* | .062 |  | | -.170* | .066 |  | | -.216* | .044 |
| Athletic | .155* | .068 |  | | .278* | .072 |  | | .217* | .048 |
| Hypermuscular | .068 | .059 |  | | .197* | .062 |  | | .133* | .042 |
| Over all builds | -.028 | .031 |  | | -.014 | .033 |  | | -.021 | .022 |

*Note.* DS = double standard. *M* = Mean. *SE* = standard errors that were used
for calculation of the 95% confidence interval for each DS score.

The MANOVA did not yield a significant main effect of Build.

* zero is out of 95% confidence interval

a differs significantly from women

b differs significantly from men

c differs significantly from the thin build

d differs significantly from the average-weight build

e differs significantly from the overweight build

f differs significantly from the athletic build

g differs significantly from the hypermuscular build

**Results with Body-Mass-Index (BMI) as a covariate:**

**Table 1**

*Means, standard errors, confidence intervals of the means, and post-hoc
t-test results for the double standard scores for each rating variable*

*dependent on the factors Group and Build*

|  | Women | | | Men | | | | Over both  groups | | |
| --- | --- | --- | --- | --- | --- | --- | --- | --- | --- | --- |
| Variables | *M* | *SE* |  | | *M* | *SE* |  | | *M* | *SE* |
| *DS valence* |  |  |  | |  |  |  | |  |  |
| Thin | -.022e | .131 |  | | -.173f | .141 |  | | -.098 | .080 |
| Average-weight | .263*befg | .103 |  | | -.490*af | .111 |  | | -.113 | .063 |
| Overweight | -.752*cdfg | .112 |  | | -.576*fg | .121 |  | | -.664* | .069 |
| Athletic | -.152bde | .102 |  | | .258*adeg | .110 |  | | .053 | .063 |
| Hypermuscular | -.118de | .095 |  | | -.122ef | .102 |  | | -.120* | .058 |
| Over all builds | -.156* | .063 |  | | -.221* | .068 |  | | -.188* | .039 |
| *DS arousal* |  |  |  | |  |  |  | |  |  |
| Thin | .411* | .131 |  | | .721* | .141 |  | | .566* | .080 |
| Average-weight | .431* | .111 |  | | .417* | .120 |  | | .424* | .068 |
| Overweight | .998* | .154 |  | | .867* | .165 |  | | .932* | .094 |
| Athletic | .538* | .117 |  | | .463* | .126 |  | | .500* | .072 |
| Hypermuscular | .510* | .121 |  | | .589* | .130 |  | | .549* | .074 |
| Over all builds | .577* | .092 |  | | .611* | .098 |  | | .594* | .056 |
| *DS body attractiveness* |  |  |  | |  |  |  | |  |  |
| Thin | -.090 | .137 |  | | .008d | .148 |  | | -.041 | .084 |
| Average-weight | .120be | .103 |  | | -.491*cf | .110 |  | | -.186* | .063 |
| Overweight | -.493*dfg | .092 |  | | -.433*f | .099 |  | | -.463* | .057 |
| Athletic | -.039e | .109 |  | | .081deg | .117 |  | | .021 | .067 |
| Hypermuscular | -.105e | .106 |  | | -.306*f | .114 |  | | -.206* | .065 |
| Over all builds | -.122 | .066 |  | | -.228* | .070 |  | | -.175* | .040 |
| *DS body fat* |  |  |  | |  |  |  | |  |  |
| Thin | -.146*e | .070 |  | | -.213*de | .075 |  | | -.180* | .043 |
| Average-weight | -.002be | .085 |  | | .435*acfg | .092 |  | | .267* | .052 |
| Overweight | .352*cdfg | .083 |  | | .395*cg | .089 |  | | .374* | .051 |
| Athletic | -.175e | .097 |  | | .024d | .104 |  | | -.076 | .059 |
| Hypermuscular | -.122e | .080 |  | | .037de | .086 |  | | -.042 | .049 |
| Over all builds | -.018 | .037 |  | | .156* | .040 |  | | .069* | .023 |
| *DS muscle mass* |  |  |  | |  |  |  | |  |  |
| Thin | -.106 | .090 |  | | -.099 | .097 |  | | -.102 | .055 |
| Average-weight | -.082 | .084 |  | | -.179 | .091 |  | | -.131* | .052 |
| Overweight | -.268* | .072 |  | | -.163* | .078 |  | | -.215* | .044 |
| Athletic | .191* | .080 |  | | .238* | .086 |  | | .214* | .049 |
| Hypermuscular | .096 | .068 |  | | .166* | .073 |  | | .131* | .042 |
| Over all builds | -.034 | .037 |  | | -.007 | .040 |  | | -.021 | .023 |

*Note.* DS = double standard. *M* = Mean. *SE* = standard errors that were used
for calculation of the 95% confidence interval for each DS score.

The MANOVA did not yield a significant main effect of Build.

* zero is out of 95% confidence interval

a differs significantly from women

b differs significantly from men

c differs significantly from the thin build

d differs significantly from the average-weight build

e differs significantly from the overweight build

f differs significantly from the athletic build

g differs significantly from the hypermuscular build

**Results with Eating pathology (EDE-Q score) as a covariate:**

**Table 1**

*Means, standard errors, confidence intervals of the means, and post-hoc
t-test results for the double standard scores for each rating variable*

*dependent on the factors Group and Build*

|  | Women | | | Men | | | | Over both  groups | | |
| --- | --- | --- | --- | --- | --- | --- | --- | --- | --- | --- |
| Variables | *M* | *SE* |  | | *M* | *SE* |  | | *M* | *SE* |
| *DS valence* |  |  |  | |  |  |  | |  |  |
| Thin | .074be | .112 |  | | -.280*af | .118 |  | | -.103e | .080 |
| Average-weight | .174*befg | .087 |  | | -.391*afg | .092 |  | | -.108e | .063 |
| Overweight | -.745*cdfg | .095 |  | | -.584*fg | .101 |  | | -.665*cdfg | .068 |
| Athletic | -.182*bde | .086 |  | | .291*acdeg | .092 |  | | .055e | .062 |
| Hypermuscular | -.184*de | .080 |  | | -.049def | .085 |  | | -.116*e | .058 |
| Over all builds | -.172* | .053 |  | | -.202* | .057 |  | | -.187* | .038 |
| *DS arousal* |  |  |  | |  |  |  | |  |  |
| Thin | .437* | .111 |  | | .692* | .118 |  | | .564*e | .080 |
| Average-weight | .396* | .094 |  | | .456* | .100 |  | | .426*e | .068 |
| Overweight | .987* | .129 |  | | .879* | .137 |  | | .933*cdfg | .093 |
| Athletic | .487* | .100 |  | | .520* | .106 |  | | .503*e | .072 |
| Hypermuscular | .459* | .103 |  | | .646* | .109 |  | | .552*e | .074 |
| Over all builds | .553* | .078 |  | | .639* | .082 |  | | .596* | .056 |
| *DS body attractiveness* |  |  |  | |  |  |  | |  |  |
| Thin | .010e | .116 |  | | -.103 | .123 |  | | -.047e | .084 |
| Average-weight | .035be | .087 |  | | -.396*af | .092 |  | | -.181*e | .062 |
| Overweight | -.519*cdfg | .079 |  | | -.405*f | .083 |  | | -.462*cdfg | .057 |
| Athletic | -.175be | .094 |  | | .232*adeg | .099 |  | | .029eg | .068 |
| Hypermuscular | -.155e | .090 |  | | -.250*f | .095 |  | | -.203*ef | .065 |
| Over all builds | -.161* | .056 |  | | -.184* | .059 |  | | -.173* | .040 |
| *DS body fat* |  |  |  | |  |  |  | |  |  |
| Thin | -.122*e | .060 |  | | -.240*de | .063 |  | | -.181*de | .043 |
| Average-weight | .067be | .072 |  | | .458*acfg | .077 |  | | .263*cfg | .052 |
| Overweight | .375*cdfg | .070 |  | | .370*cfg | .074 |  | | .372*cfg | .051 |
| Athletic | -.122e | .082 |  | | -.036de | .087 |  | | -.079de | .059 |
| Hypermuscular | -.071e | .069 |  | | -.019de | .073 |  | | -.045de | .049 |
| Over all builds | .025 | .032 |  | | .107* | .034 |  | | .066* | .023 |
| *DS muscle mass* |  |  |  | |  |  |  | |  |  |
| Thin | -.040 | .077 |  | | -.172* | .082 |  | | -.106fg | .055 |
| Average-weight | -.084 | .071 |  | | -.177 | .075 |  | | -.131*fg | .051 |
| Overweight | -.249* | .061 |  | | -.184* | .065 |  | | -.216*fg | .044 |
| Athletic | .110 | .069 |  | | .329* | .073 |  | | .219*cde | .049 |
| Hypermuscular | .075 | .057 |  | | .189* | .061 |  | | .132*cde | .041 |
| Over all builds | -.038 | .031 |  | | -.003 | .033 |  | | -.020 | .023 |

*Note.* DS = double standard. *M* = Mean. *SE* = standard errors that were used
for calculation of the 95% confidence interval for each DS score.

* zero is out of 95% confidence interval

a differs significantly from women

b differs significantly from men

c differs significantly from the thin build

d differs significantly from the average-weight build

e differs significantly from the overweight build

f differs significantly from the athletic build

g differs significantly from the hypermuscular build

**Results with Body dissatisfaction (subscale EDI-2) as a covariate:**

**Table 1**

*Means, standard errors, confidence intervals of the means, and post-hoc
t-test results for the double standard scores for each rating variable*

*dependent on the factors Group and Build*

|  | Women | | | Men | | | | Over both  groups | | |
| --- | --- | --- | --- | --- | --- | --- | --- | --- | --- | --- |
| Variables | *M* | *SE* |  | | *M* | *SE* |  | | *M* | *SE* |
| *DS valence* |  |  |  | |  |  |  | |  |  |
| Thin | .078be | .114 |  | | -.285*af | .114 |  | | -.104e | .080 |
| Average-weight | .180*befg | .089 |  | | -.397*afg | .095 |  | | -.109e | .063 |
| Overweight | -.717*cdfg | .096 |  | | -.615*fg | .102 |  | | -.666*cdfg | .068 |
| Athletic | -.146bde | .087 |  | | .251*acdeg | .092 |  | | .053e | .061 |
| Hypermuscular | -.167*de | .082 |  | | -.067def | .087 |  | | -.117*e | .058 |
| Over all builds | -.154* | .054 |  | | -.223* | .057 |  | | -.189* | .038 |
| *DS arousal* |  |  |  | |  |  |  | |  |  |
| Thin | .470* | .112 |  | | .655* | .119 |  | | .563*e | .080 |
| Average-weight | .385* | .096 |  | | .469* | .102 |  | | .427*e | .068 |
| Overweight | .981* | .132 |  | | .886* | .140 |  | | .933*cdfg | .094 |
| Athletic | .482* | .102 |  | | .525* | .108 |  | | .504*e | .072 |
| Hypermuscular | .437* | .104 |  | | .670* | .110 |  | | .554*e | .074 |
| Over all builds | .551* | .079 |  | | .641* | .084 |  | | .596* | .056 |
| *DS body attractiveness* |  |  |  | |  |  |  | |  |  |
| Thin | .003e | .119 |  | | -.096 | .126 |  | | -.046e | .084 |
| Average-weight | .050be | .088 |  | | -.413*af | .094 |  | | -.181*e | .063 |
| Overweight | -.528*cdfg | .080 |  | | -.395*f | .085 |  | | -.461*cdfg | .057 |
| Athletic | -.155be | .095 |  | | .209*adeg | .101 |  | | .027eg | .067 |
| Hypermuscular | -.150e | .092 |  | | -.256*f | .097 |  | | -.203*ef | .065 |
| Over all builds | -.156* | .057 |  | | -.190* | .060 |  | | -.173* | .040 |
| *DS body fat* |  |  |  | |  |  |  | |  |  |
| Thin | -.131*e | .061 |  | | -.230*de | .064 |  | | -.180*de | .043 |
| Average-weight | .068be | .074 |  | | .457*acfg | .079 |  | | .263*cfg | .052 |
| Overweight | .366*cdfg | .071 |  | | .380*cfg | .076 |  | | .373*cfg | .051 |
| Athletic | -.122e | .084 |  | | -.035de | .089 |  | | -.079de | .059 |
| Hypermuscular | -.044e | .069 |  | | -.050de | .074 |  | | -.047de | .049 |
| Over all builds | .027 | .033 |  | | .104* | .035 |  | | .066* | .023 |
| *DS muscle mass* |  |  |  | |  |  |  | |  |  |
| Thin | -.045 | .078 |  | | -.167* | .083 |  | | -.106fg | .055 |
| Average-weight | -.073 | .072 |  | | -.189* | .077 |  | | -.131*fg | .051 |
| Overweight | -.258* | .062 |  | | -.174* | .066 |  | | -.216*fg | .044 |
| Athletic | .109 | .070 |  | | .329* | .074 |  | | .219*cde | .049 |
| Hypermuscular | .060 | .059 |  | | .206* | .062 |  | | .133*cde | .042 |
| Over all builds | -.041 | .032 |  | | .001 | .034 |  | | -.020 | .023 |

*Note.* DS = double standard. *M* = Mean. *SE* = standard errors that were used
for calculation of the 95% confidence interval for each DS score.

* zero is out of 95% confidence interval

a differs significantly from women

b differs significantly from men

c differs significantly from the thin build

d differs significantly from the average-weight build

e differs significantly from the overweight build

f differs significantly from the athletic build

g differs significantly from the hypermuscular build
